# Supplementary material
Source: PubMed Central journal article supplement (PMC3233486)
Supplement: cc1011_1838SD1.pdf [file cc1011_1838SD1.pdf]

**Supplementary Table 1a | SH2 domains included on the microarrays.**

| <b>Domain</b> | <b>Entrez gene symbol</b> | <b>Entrez gene ID</b> |
|---------------|---------------------------|-----------------------|
| S1            | PIK3R1-N                  | 5295                  |
| S2            | PIK3R1-C                  | 5295                  |
| S3            | PIK3R1-NC                 | 5295                  |
| S4            | PIK3R2-N                  | 5296                  |
| S5            | PIK3R2-C                  | 5296                  |
| S6            | PIK3R2-NC                 | 5296                  |
| S7            | PIK3R3-N                  | 8503                  |
| S8            | PIK3R3-C                  | 8503                  |
| S9            | PIK3R3-NC                 | 8503                  |
| S10           | DAPP1                     | 27071                 |
| S11           | ABL1                      | 25                    |
| S12           | ABL2                      | 27                    |
| S13           | FGR                       | 2268                  |
| S14           | SRC                       | 6714                  |
| <b>S15 ‡</b>  | <b>SLA</b>                | <b>6503</b>           |
| S16           | SLA2                      | 84174                 |
| S17           | ZAP70-N                   | 7535                  |
| S18           | ZAP70-C                   | 7535                  |
| S19           | ZAP70-NC                  | 7535                  |
| S20           | BMX                       | 660                   |
| S21           | SYK-N                     | 6850                  |
| S22           | SYK-C                     | 6850                  |
| S23           | SYK-NC                    | 6850                  |
| S24           | TEC                       | 7006                  |
| S25           | LYN                       | 4067                  |
| <b>S26 ‡</b>  | <b>FRK</b>                | <b>2444</b>           |
| S27           | BLK                       | 640                   |
| S28           | ITK                       | 3702                  |
| S29           | BTK                       | 695                   |
| S30           | TXK                       | 7294                  |
| S31           | FER                       | 2241                  |
| S32           | HCK                       | 3055                  |
| S33           | PTK6                      | 5753                  |
| S34           | LCK                       | 3932                  |

| <b>Domain</b> | <b>Entrez gene symbol</b> | <b>Entrez gene ID</b> |
|---------------|---------------------------|-----------------------|
| S35           | FES                       | 2242                  |
| S36           | YES1                      | 7525                  |
| S37           | MATK                      | 4145                  |
| S38           | PLCG1-N                   | 5335                  |
| S39           | PLCG1-C                   | 5335                  |
| S40           | PLCG1-NC                  | 5335                  |
| S41           | PLCG2-N                   | 5336                  |
| S42           | PLCG2-C                   | 5336                  |
| S43           | PLCG2-NC                  | 5336                  |
| S44           | GRB2                      | 2885                  |
| S45           | GRB7                      | 2886                  |
| S46           | GRB10                     | 2887                  |
| S47           | GRB14                     | 2888                  |
| S48           | GRAP2                     | 9402                  |
| S49           | CRK                       | 1398                  |
| S50           | CRKL                      | 1399                  |
| S51           | NCK1                      | 4690                  |
| S52           | NCK2                      | 8440                  |
| S53           | APS                       | 10603                 |
| S54           | SH3BP2                    | 6452                  |
| S55           | LNK                       | 10019                 |
| S56           | SH2B                      | 25970                 |
| S57           | PTPN6-C                   | 5777                  |
| S58           | PTPN6-N                   | 5777                  |
| S59           | PTPN6-NC                  | 5777                  |
| S60           | PTPN11-N                  | 5781                  |
| S61           | PTPN11-C                  | 5781                  |
| S62           | PTPN11-NC                 | 5781                  |
| S63           | E189410 *                 |                       |
| S64 ‡         | MIST                      | 116449                |
| S65 ‡         | E185634 *                 |                       |
| S66           | HSH2D                     | 84941                 |
| S67           | CTEN                      | 84951                 |
| S68           | E109111 *                 |                       |
| S69           | E138606 *                 |                       |

| <b>Domain</b> | <b>Entrez gene symbol</b> | <b>Entrez gene ID</b> |
|---------------|---------------------------|-----------------------|
| S70           | E169291 *                 |                       |
| S71           | E105251 *                 |                       |
| S72           | SHB                       | 6461                  |
| S73           | TNS                       | 7145                  |
| S74           | TENC1                     | 23371                 |
| S75           | TENS1                     | 64759                 |
| S76           | SH2D1A                    | 4068                  |
| S77           | INPPL1                    | 3636                  |
| S78           | EAT2                      | 117157                |
| S79           | BRDG1                     | 26228                 |
| S80           | LCP2                      | 3937                  |
| S81           | BLNK                      | 29760                 |
| S82           | RIN1                      | 9610                  |
| S83 ‡         | RIN2                      | 54453                 |
| S84 ‡         | RIN3                      | 79890                 |
| S85           | SH2D3A                    | 10045                 |
| S86 ‡         | CHN1                      | 1123                  |
| S87           | CHN2                      | 1124                  |
| S88           | RASA1-N                   | 5921                  |
| S89           | RASA1-C                   | 5921                  |
| S90           | RASA1-NC                  | 5921                  |
| S91           | BCAR3                     | 8412                  |
| S92           | SH2D2A                    | 9047                  |
| S93           | SH2D3C                    | 10044                 |
| S94           | VAV1                      | 7409                  |
| S95           | VAV2                      | 7410                  |
| S96           | VAV3                      | 10451                 |
| S97           | SHC1                      | 6464                  |
| S98           | SHC3                      | 53358                 |
| S99 ‡         | JAK1                      | 3716                  |
| S100          | JAK2                      | 3717                  |
| S101          | JAK3                      | 3718                  |
| S102 #        | STAT1                     | 6772                  |
| S103 #        | STAT2                     | 6773                  |
| S104 ‡        | STAT3                     | 6774                  |

| Domain | Entrez gene symbol | Entrez gene ID |
|--------|--------------------|----------------|
| S105 ‡ | STAT4              | 6775           |
| S106 ‡ | STAT5a             | 6776           |
| S107 ‡ | STAT6              | 6778           |
| S108 ‡ | SOCS1              | 8651           |
| S109 ‡ | SOCS2              | 8835           |
| S110 ‡ | SOCS3              | 9021           |
| S111 ‡ | SOCS4              | 122809         |
| S112 ‡ | SOCS5              | 9655           |
| S113 ‡ | SOCS6              | 9306           |
| S114 ‡ | SOCS7              | 30837          |
| S115 ‡ | CISH               | 1154           |
| S115 # | CBL                | 867            |
| §      | FYN                | 2534           |
| ¥      | CSK                | 1445           |
| ¥      | SRMS               | 6725           |
| ¥      | STAT5b             | 6777           |

\* no official Entrez gene symbol

§ cloned but did not express

¥ not cloned

# construct included more than just the SH2 domain to improve folding and stability

‡ expressed poorly or as insoluble aggregate and was not included on the arrays

**Supplementary Table 1b | PTB domains included on the microarrays.**

| <b>Domain</b> | <b>Entrez gene symbol</b> | <b>Entrez gene ID</b> |
|---------------|---------------------------|-----------------------|
| P1            | TNS-PTB                   | 7145                  |
| P2            | TENC1-PTB                 | 23371                 |
| P3            | SHC1-PTB                  | 6464                  |
| P4            | SHC3-PTB                  | 53358                 |
| P5            | APBB1-N                   | 322                   |
| P6            | APBB1-C                   | 322                   |
| P7            | APBB1-NC                  | 322                   |
| P8            | APBB2-N                   | 323                   |
| P9            | APBB2-C                   | 323                   |
| P10           | APBB2-NC                  | 323                   |
| P11           | APBB3-N                   | 10307                 |
| P12           | APBB3-C                   | 10307                 |
| P13           | APBB3-NC                  | 10307                 |
| P14           | APBA1                     | 320                   |
| P15           | APBA2                     | 321                   |
| P16           | APBA3                     | 9546                  |
| P17           | DAB1                      | 1600                  |
| P18           | DAB2                      | 1601                  |
| P19 ‡         | MAPK8IP1                  | 9479                  |
| P20 ‡         | MAPK8IP2                  | 23542                 |
| P21           | NUMBL                     | 9253                  |
| P22           | NUMB                      | 8650                  |
| P23           | RGS12                     | 6002                  |
| P24           | E129946 *                 |                       |
| P25 ‡         | E136111 *                 |                       |
| P26           | DOK1                      | 1796                  |
| P27           | DOK2                      | 9046                  |
| P28           | DOK4                      | 55715                 |
| P29           | DOK5                      | 55816                 |
| P30           | DOK5L                     | 220164                |
| P31           | IRS1                      | 3667                  |
| P32 ‡         | IRS2                      | 8660                  |
| P33           | IRS4                      | 8471                  |
| P34 ‡         | FRS2                      | 10818                 |

| Domain | Entrez gene symbol | Entrez gene ID |
|--------|--------------------|----------------|
| P35    | FRS3               | 10817          |
| P36    | RABGAP1            | 23637          |
| P37    | RABGAP1L           | 9910           |
| P38    | ANKS1              | 23294          |
| P39    | APPL               | 26060          |
| P40    | GULP1              | 51454          |
| P41    | EPS8L2             | 64787          |
| P42 ‡  | TLN1               | 7094           |
| P43    | CCM2               | 83605          |
| P44    | EB-1               | 56899          |
| ¥      | TENS1              | 64759          |
| ¥      | TLN2               | 83660          |
| ¥      | FLJ20701 *         | 55022          |

\* no official Entrez gene symbol

¥ not cloned

‡ expressed poorly or as insoluble aggregate and was not included on the arrays

# Supplementary Figure 1

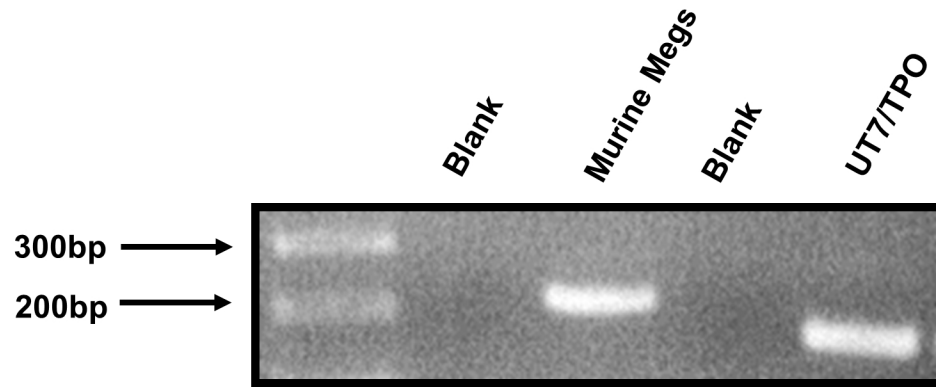

**Supplementary Figure 1. Detection of presence of Tensin2 mRNA via Reverse Transcriptase PCR in murine megakaryocytes (Murine Megs) and human megakaryocytic leukemia cell line UT7-TPO**
